# Supplementary material
Source: PubMed Central journal article supplement (PMC7526044)
Supplement: NIHMS1627660-supplement-Supplemental_Info.pdf [file NIHMS1627660-supplement-Supplemental_Info.pdf]

**Supplemental Figure S1. Correlation between robotic-assisted MIS-RH / Open-RH ratio and extent of surgical morbidity.**

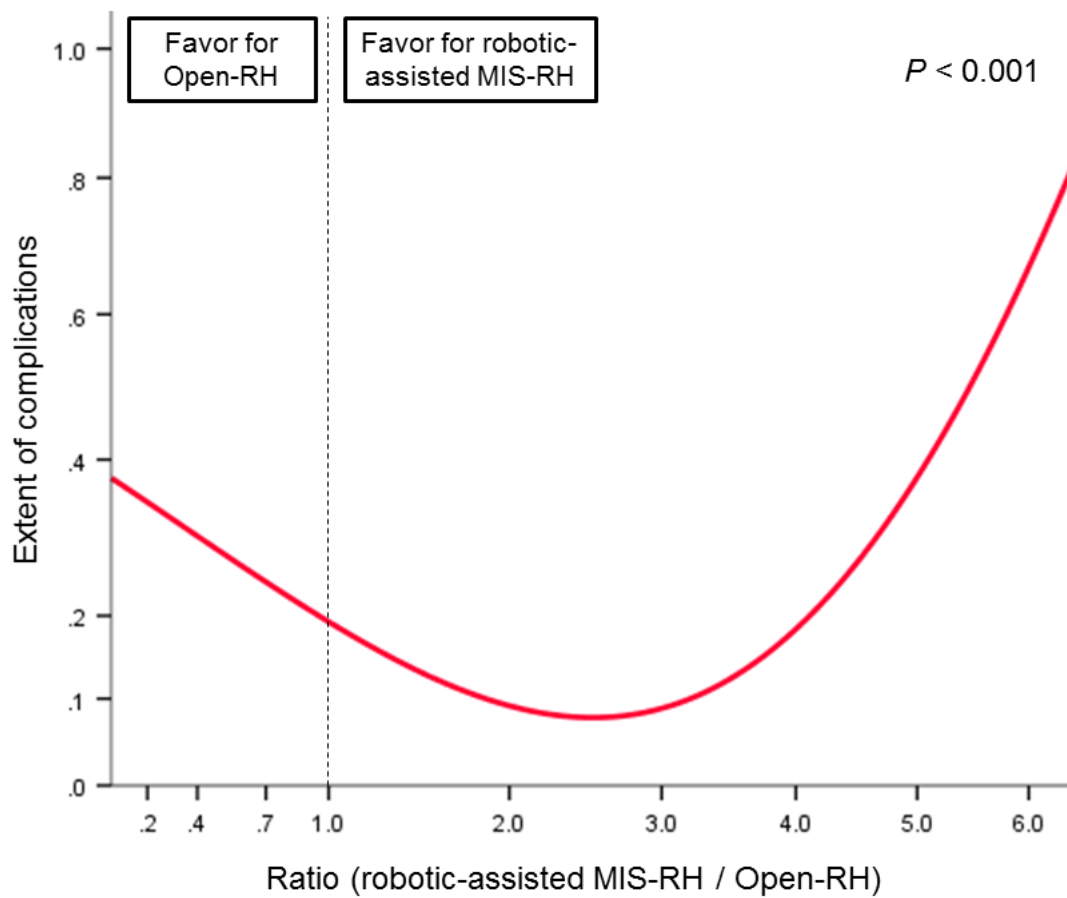

Total 11 models were assessed for the curve estimation in each cohort. The most-fit curve model was quadratic pattern. The analysis-determined cutoff of reflection point was ratio of >2.0. The vertical dashed line indicate the ratio of 1.0, implying that robotic-assisted MIS-RH and Open-RH was equally chosen. The both axes are shown in power scale to enhance the visualization of analysis.

## Supplemental Table S1. ICD-9 code list.

| ICD-9 Procedure Codes                          |                                                                                                                                                                     |
|------------------------------------------------|---------------------------------------------------------------------------------------------------------------------------------------------------------------------|
| Radical hysterectomy (RH)                      |                                                                                                                                                                     |
| Laparoscopic abdominal RH                      | 6861                                                                                                                                                                |
| Abdominal RH                                   | 6869                                                                                                                                                                |
| Laparoscopic vaginal RH                        | 6871                                                                                                                                                                |
| Vaginal RH                                     | 6879                                                                                                                                                                |
| Robot-assisted surgery                         | 1741, 1743, 1744, 1745, 1749                                                                                                                                        |
| Lymphadenectomy                                | 400, 401, 4024, 4029, 403, 4052, 4053, 4054, 4059, 409                                                                                                              |
| ICD-9 Diagnosis Codes                          |                                                                                                                                                                     |
| Cervical cancer                                | 1800, 1801, 1808, 1809                                                                                                                                              |
| Obesity                                        | 27800                                                                                                                                                               |
| Morbid obesity                                 | 27801                                                                                                                                                               |
| History of other malignancy                    | See codes for CC14                                                                                                                                                  |
| Metastatic disease                             | See codes for CC16                                                                                                                                                  |
| History of chemotherapy                        | V5811, V662, V672, V8741                                                                                                                                            |
| History of radiation                           | V153, V661, E9268, E9269, V671                                                                                                                                      |
| Perioperative complications                    |                                                                                                                                                                     |
| Position-dependent complications               |                                                                                                                                                                     |
| Fluid overload                                 | 27669                                                                                                                                                               |
| Laryngeal edema                                | 47825, 4786                                                                                                                                                         |
| Air embolism                                   | 9991, 9580                                                                                                                                                          |
| Cerebral edema                                 | 3485                                                                                                                                                                |
| Pulmonary edema                                | 5184                                                                                                                                                                |
| Respiratory failure                            | 5185, 5188, 99739                                                                                                                                                   |
| Requirement for prolonged ventilation          | 9671, 9672                                                                                                                                                          |
| Aspiration                                     | 77085, 77086, 99732                                                                                                                                                 |
| Atelectasis                                    | 7704, 7705                                                                                                                                                          |
| Peripheral nerve injury                        | 953, 954, 955, 956, 957, 9970                                                                                                                                       |
| Ocular injury                                  | 36100, 36101, 36102, 36103, 36104, 36105, 3612, 3613, 36283, 3700, 3713, 37140, 37142, 37170, 3712, 37250, 37271, 37272, 37273, 37289, 3729, 9180, 9181, 9182, 9189 |
| Cardiac arrhythmia, arrest, or failure         | 427, 428, 429                                                                                                                                                       |
| Compartment syndrome                           | 9589, 7297                                                                                                                                                          |
| Rhabdomyolysis                                 | 72888                                                                                                                                                               |
| Bladder injury                                 | 8670, 8671                                                                                                                                                          |
| Ureteral injury                                | 8672, 8673                                                                                                                                                          |
| Intestinal injury                              | 8632, 8633, 8634, 8635, 8628                                                                                                                                        |
| Vascular injury                                | 9020, 9021, 9022, 9023, 9024, 9025, 9028, 9029, 9049                                                                                                                |
| Postoperative hemorrhage                       | 99811, 9582, 2851                                                                                                                                                   |
| Postoperative shock                            | 9980, 9954                                                                                                                                                          |
| Wound complications                            | 9583, 99812, 99813, 9983, 9985, 99883                                                                                                                               |
| Venous Thromboembolism/Pulmonary Embolism      | 452, 453, 4151, 4162                                                                                                                                                |
| Cerebrovascular Accident                       | 4329, 433, 434, 435, 436, 437                                                                                                                                       |
| Myocardial Infarction                          | 410                                                                                                                                                                 |
| Pneumonia                                      | 480, 481, 482, 483, 484, 485, 486, 99731, 99732                                                                                                                     |
| Systemic Inflammatory Response Syndrome/Sepsis | 9959                                                                                                                                                                |
| Ileus/Small Bowel Obstruction                  | 5601, 5603, 5608, 5609                                                                                                                                              |
| Intestinal perforation                         | 56983                                                                                                                                                               |
| AKI                                            | 584                                                                                                                                                                 |
| Pyelonephritis                                 | 590                                                                                                                                                                 |
| Coagulopathy                                   | 79092, 2867, 28659, 2866, 2867, 2869                                                                                                                                |
| Electrolyte imbalance                          | 276                                                                                                                                                                 |
| Intraabdominal abscess                         | 56722, 56731, 56738, 5695                                                                                                                                           |
| Charlson Comorbidity Index                     |                                                                                                                                                                     |
| CC1: Myocardial Infarction                     | 410, 411, 412                                                                                                                                                       |
| CC2: Congestive Heart Failure                  | 39891, 40201, 40211, 40291, 40401, 40403, 40411, 40413, 40491, 40493, 4254, 4255, 4357, 4258, 4259, 428                                                             |

|                                        |                                                                                                                                                                                                                                                                                                            |
|----------------------------------------|------------------------------------------------------------------------------------------------------------------------------------------------------------------------------------------------------------------------------------------------------------------------------------------------------------|
| CC3: Peripheral Vascular Disease       | 0930, 4373, 440, 441, 442, 443, 444, 445, 446, 447, 448, 449, 451, 452, 453, 454, 455, 456                                                                                                                                                                                                                 |
| CC4: Cerebrovascular Disease           | 3623, 430, 431, 432, 433, 434, 435, 436, 437, 438                                                                                                                                                                                                                                                          |
| CC5: Dementia                          | 290, 294, 331                                                                                                                                                                                                                                                                                              |
| CC6: Chronic Pulmonary Disease         | 415, 416, 490, 491, 492, 493, 494, 495, 496, 500, 501, 502, 503, 504, 505, 506, 507, 508, 510, 511, 512, 513, 514, 515, 516, 517, 518, 519                                                                                                                                                                 |
| CC7: Connective Tissue Disease         | 710, 711, 712, 713, 714, 715, 716                                                                                                                                                                                                                                                                          |
| CC8: Peptic Ulcer Disease              | 531, 532, 533, 534, 535                                                                                                                                                                                                                                                                                    |
| CC9: Mild Liver Disease                | 0701, 0703, 0705, 07070, 0709, 5710, 5713, 5714, 5716, 5718, 5719, 5731, 5732, 5733, 5738, 5739                                                                                                                                                                                                            |
| CC10: Diabetes without complications   | 2490, 2500                                                                                                                                                                                                                                                                                                 |
| CC11: Diabetes with complications      | 2491, 2492, 2493, 2494, 2495, 2496, 2497, 2498, 2499, 2501, 2502, 2503, 2504, 2505, 2506, 2507, 2508, 2509                                                                                                                                                                                                 |
| CC12: Paraplegia and hemiplegia        | 3341, 342, 343, 344                                                                                                                                                                                                                                                                                        |
| CC13: Renal disease                    | 403, 404, 580, 581, 582, 583, 584, 585, 586, 587, 588, 589, 590, 591, 592, 593                                                                                                                                                                                                                             |
| CC14: Cancer                           | 140, 141, 142, 143, 144, 145, 146, 147, 148, 149, 150, 151, 152, 153, 154, 155, 156, 157, 158, 159, 160, 161, 162, 163, 164, 165, 170, 171, 172, 173, 174, 175, 176, 179, 180, 181, 182, 183, 184, 185, 186, 187, 188, 189, 190, 191, 192, 193, 194, 195, 200, 201, 202, 203, 204, 205, 206, 207, 208, 209 |
| CC15: Moderate or Severe Liver Disease | 4560, 4561, 4562, 570, 5711, 5712, 5715, 572, 5730, 5734, 5735, V427, 99682                                                                                                                                                                                                                                |
| CC16: Metastatic Carcinoma             | 196, 197, 198, 199                                                                                                                                                                                                                                                                                         |
| CC17: HIV/AIDS                         | 042, 07953, 79571, V08                                                                                                                                                                                                                                                                                     |

---

**Supplemental Table S2. Annualized hospital surgical volume for MIS-RH between 2007-2011.**

| Annualized SV | Centers | Proportion | Grouping |
|---------------|---------|------------|----------|
| 1             | 69      | 42.3%      | Low      |
| 1.1-1.9       | 10      | 6.1%       |          |
| 2.0-2.9       | 42      | 25.8%      | Mid      |
| 3.0-4.0       | 28      | 17.2%      |          |
| 4.1-5.0       | 6       | 3.7%       | High     |
| >5.0          | 8       | 4.9%       |          |
| Total         | 163     | 100%       |          |

Annualized SV of >4.0 MIS-RHs per year represented top 10decile of annualized SV that was used for the high-volume centers. Abbreviation: SV, hospital surgical volume for MIS-RH.

**Supplemental Table S3. Annualized hospital surgical volume for Open-RH between 2007-2011.**

| Annualized SV | Centers | Proportion | Grouping |
|---------------|---------|------------|----------|
| 1             | 127     | 31.4%      | Low      |
| 1.1-2.4       | 77      | 19.0%      |          |
| 2.5-2.9       | 13      | 3.2%       | Mid      |
| 3.0-3.9       | 36      | 8.9%       |          |
| 4.0-4.9       | 34      | 8.4%       |          |
| 5.0-5.9       | 26      | 6.4%       |          |
| 6.0-6.9       | 19      | 4.7%       |          |
| 7.0-7.9       | 16      | 4.0%       |          |
| 8.0-8.9       | 16      | 4.0%       | High     |
| 9.0-9.9       | 12      | 3.0%       |          |
| 10.0-11.9     | 9       | 2.2%       |          |
| 12.0-14.9     | 10      | 2.5%       |          |
| ≥15           | 10      | 2.5%       |          |
| Total         | 405     | 100        |          |

Annualized SV of  $\geq 9.0$  Open-RHs per year represented top 10decile of annualized SV that was used for the high-volume centers. Abbreviation: SV, hospital surgical volume for Open-RH.

**Supplemental Table S4. Patient demographics per hospital surgical volume (MIS-RH cohort, n=2,202).**

| Characteristic           | Low-volume<br>n=521 | Mid-volume<br>n=1111 | High-volume<br>n=570 | P-value |
|--------------------------|---------------------|----------------------|----------------------|---------|
| Number                   |                     |                      |                      |         |
| Age (yr)                 | 46.6 (±12.0)        | 45.8 (±12.4)         | 48.6 (±12.0)         | <0.001  |
| Year                     |                     |                      |                      | <0.001  |
| 2007                     | 43 (8.3%)           | 129 (11.6%)          | 205 (36.0%)          |         |
| 2008                     | 85 (16.3%)          | 175 (15.8%)          | 94 (16.5%)           |         |
| 2009                     | 113 (21.7%)         | 297 (26.7%)          | 74 (13.0%)           |         |
| 2010                     | 163 (31.3%)         | 244 (22.0%)          | 93 (16.3%)           |         |
| 2011                     | 117 (22.5%)         | 266 (23.9%)          | 103 (18.1%)          |         |
| Race/ethnicity           |                     |                      |                      | <0.001  |
| White                    | 292 (56.2%)         | 602 (54.1%)          | 314 (55.0%)          |         |
| Black                    | 42 (8.1%)           | 36 (3.2%)            | 59 (10.3%)           |         |
| Hispanic                 | 57 (11.0%)          | 193 (17.4%)          | 91 (15.9%)           |         |
| Asian                    | 25 (4.8%)           | 59 (5.3%)            | 25 (4.4%)            |         |
| Others                   | 26 (5.0%)           | 30 (2.7%)            | 13 (2.3%)            |         |
| Missing                  | 78 (15.0%)          | 192 (17.3%)          | 69 (12.1%)           |         |
| Obesity                  |                     |                      |                      | 0.001   |
| No                       | 487 (93.7%)         | 1041 (93.7%)         | 515 (90.4%)          |         |
| Class I-II               | 23 (4.4%)           | 47 (4.2%)            | 50 (8.8%)            |         |
| Class III                | **                  | 23 (2.1%)            | **                   |         |
| Charlson Index           |                     |                      |                      | 0.003   |
| 0                        | 417 (80.2%)         | 933 (84.1%)          | 462 (80.9%)          |         |
| 1                        | 73 (14.0%)          | 121 (10.9%)          | 84 (14.7%)           |         |
| 2                        | 21 (4.0%)           | 19 (1.7%)            | 15 (2.6%)            |         |
| ≥3                       | **                  | 37 (3.3%)            | **                   |         |
| Median household income  |                     |                      |                      | <0.001  |
| <\$39,000                | 84 (16.2%)          | 220 (19.8%)          | 143 (25.1%)          |         |
| \$39,000-\$47,999        | 118 (22.7%)         | 216 (19.4%)          | 105 (18.4%)          |         |
| \$48,000-\$62,999        | 112 (21.5%)         | 302 (27.2%)          | 123 (21.6%)          |         |
| ≥\$63,000                | 187 (36.0%)         | 352 (31.7%)          | 167 (29.3%)          |         |
| Missing                  | 19 (3.7%)           | 22 (2.0%)            | 32 (5.6%)            |         |
| Primary expected payer   |                     |                      |                      | <0.001  |
| Medicare                 | 75 (14.4%)          | 97 (8.7%)            | 71 (12.5%)           |         |
| Medicaid                 | 105 (20.1%)         | 224 (20.2%)          | 74 (13.0%)           |         |
| Private including HMO    | 332 (63.6%)         | 671 (60.4%)          | 392 (68.8%)          |         |
| Others/missing           | **                  | 119 (10.7%)          | 33 (5.8%)            |         |
| Hospital bed size        |                     |                      |                      | <0.001  |
| Small                    | 44 (8.4%)           | 77 (6.9%)            | 57 (10.0%)           |         |
| Medium                   | 110 (21.1%)         | 170 (15.3%)          | 77 (13.5%)           |         |
| Large                    | 367 (70.4%)         | 846 (76.1%)          | 436 (76.5%)          |         |
| Missing                  | 0                   | 18 (1.6%)            | 0                    |         |
| Hospital teaching status |                     |                      |                      | <0.001  |
| Rural                    | 0                   | **                   | 0                    |         |
| Urban Non-Teaching       | 110 (21.1%)         | 335 (30.2%)          | 95 (16.7%)           |         |
| Urban Teaching           | 411 (78.9%)         | 751 (67.6%)          | 475 (83.3%)          |         |
| Missing                  | 0                   | 18 (1.6%)            | 0                    |         |
| Hospital region          |                     |                      |                      | <0.001  |
| Northeast                | 166 (31.9%)         | 157 (14.1%)          | 194 (34.0%)          |         |
| Midwest                  | 109 (21.0%)         | 179 (16.1%)          | 0                    |         |
| South                    | 139 (26.7%)         | 399 (35.9%)          | 164 (18.8%)          |         |
| West                     | 106 (20.4%)         | 376 (33.8%)          | 212 (37.2%)          |         |
| Lymphadenectomy          |                     |                      |                      | 0.045   |
| No                       | 54 (10.4%)          | 79 (7.1%)            | 39 (6.8%)            |         |
| Yes                      | 467 (89.6%)         | 1032 (92.9%)         | 531 (93.2%)          |         |

Mean ( $\pm$ SD) or number (percentage per column) is shown. Chi-square test or one-way ANOVA test for *P*-value. \*\* Suppressed per the HCUP requirement (1-10). Total number may not be 2,202 due to weighted values.

**Supplemental Table S5. Independent characteristics for MIS-RH hospital surgical volume (n=2,202).**

| Characteristic           | Adjusted-OR (95%CI) | P-value |
|--------------------------|---------------------|---------|
| Year                     |                     | <0.001  |
| 2007                     | 8.34 (3.99-17.4)    |         |
| 2008                     | 1.58 (0.91-2.77)    |         |
| 2009                     | 1.30 (0.79-2.16)    |         |
| 2010                     | 0.86 (0.52-1.41)    |         |
| 2011                     | 1                   |         |
| Hospital bed size        |                     | 0.003   |
| Small                    | 6.16 (1.97-19.2)    |         |
| Medium                   | 0.78 (0.48-1.25)    |         |
| Large                    | 1                   |         |
| Hospital teaching status |                     | <0.001  |
| Rural                    | 1                   |         |
| Urban Non-Teaching       | 0.95 (0.50-1.83)    |         |
| Urban Teaching           | 3.88 (2.15-7.00)    |         |
| Hospital region          |                     | <0.001  |
| Northeast                | 1                   |         |
| Midwest                  | 0.23 (0.13-0.41)    |         |
| South                    | 0.96 (0.57-1.62)    |         |
| West                     | 2.82 (1.48-5.38)    |         |

A generalized equator estimation model with conditional backward method (final stopping rule at  $P < 0.05$ ) was fitted in the analysis. Missing cases in hospital bed size and teaching status were not used due to the possibility of multicollinearity. Abbreviations: OR, odds ratio; and CI, confidence interval.



**Supplemental Table S6. Patient demographics per hospital surgical volume (Open-RH cohort, n=11,187).**

| Characteristic           | Low-volume<br>n=1611 | Mid-volume<br>n=5637 | High-volume<br>n=3939 | P-value |
|--------------------------|----------------------|----------------------|-----------------------|---------|
| Number                   |                      |                      |                       |         |
| Age (yr)                 | 48.8 (±14.3)         | 45.9 (±12.8)         | 45.7 (±12.0)          | <0.001  |
| Year                     |                      |                      |                       | <0.001  |
| 2007                     | 337 (20.9%)          | 1193 (21.2%)         | 1163 (29.5%)          |         |
| 2008                     | 324 (20.1%)          | 1180 (20.9%)         | 815 (20.7%)           |         |
| 2009                     | 372 (23.1%)          | 1181 (21.0%)         | 830 (21.1%)           |         |
| 2010                     | 340 (21.1%)          | 1324 (23.5%)         | 814 (20.7%)           |         |
| 2011                     | 238 (14.8%)          | 758 (13.4%)          | 318 (8.1%)            |         |
| Race/ethnicity           |                      |                      |                       | <0.001  |
| White                    | 854 (53.0%)          | 2770 (49.1%)         | 1893 (48.1%)          |         |
| Black                    | 126 (7.8%)           | 593 (10.5%)          | 322 (8.2%)            |         |
| Hispanic                 | 276 (17.1%)          | 718 (12.7%)          | 688 (17.5%)           |         |
| Asian                    | 108 (6.7%)           | 259 (4.6%)           | 121 (3.1%)            |         |
| Others                   | 48 (3.0%)            | 249 (4.4%)           | 154 (3.9%)            |         |
| Missing                  | 200 (12.4%)          | 1047 (18.6%)         | 761 (19.3%)           |         |
| Obesity                  |                      |                      |                       | 0.030   |
| No                       | 1493 (92.6%)         | 5115 (90.8%)         | 3629 (92.1%)          |         |
| Class I-II               | 74 (4.6%)            | 342 (6.1%)           | 215 (5.5%)            |         |
| Class III                | 45 (2.8%)            | 179 (3.2%)           | 95 (2.4%)             |         |
| Charlson Index           |                      |                      |                       | <0.001  |
| 0                        | 1207 (74.9%)         | 4209 (74.7%)         | 2993 (76.0%)          |         |
| 1                        | 270 (16.8%)          | 1083 (19.2%)         | 804 (20.4%)           |         |
| 2                        | 91 (5.6%)            | 254 (4.5%)           | 95 (2.4%)             |         |
| ≥3                       | 43 (2.7%)            | 90 (1.6%)            | 47 (1.2%)             |         |
| Median household income  |                      |                      |                       | <0.001  |
| <\$39,000                | 365 (22.6%)          | 1440 (25.6%)         | 1231 (31.2%)          |         |
| \$39,000-\$47,999        | 389 (24.1%)          | 1380 (24.5%)         | 782 (19.8%)           |         |
| \$48,000-\$62,999        | 398 (24.7%)          | 1302 (23.1%)         | 922 (23.4%)           |         |
| ≥\$63,000                | 403 (25.0%)          | 1319 (23.4%)         | 928 (23.6%)           |         |
| Missing                  | 57 (3.5%)            | 195 (3.5%)           | 77 (2.0%)             |         |
| Primary expected payer   |                      |                      |                       | <0.001  |
| Medicare                 | 238 (14.8%)          | 507 (9.0%)           | 303 (7.7%)            |         |
| Medicaid                 | 297 (18.4%)          | 1214 (21.5%)         | 811 (20.6%)           |         |
| Private including HMO    | 959 (59.5%)          | 3286 (58.3%)         | 2258 (57.3%)          |         |
| Others/missing           | 118 (7.3%)           | 629 (11.2%)          | 567 (14.4%)           |         |
| Hospital bed size        |                      |                      |                       | <0.001  |
| Small                    | 172 (10.7%)          | 192 (3.4%)           | 361 (9.2%)            |         |
| Medium                   | 407 (25.3%)          | 1317 (23.4%)         | 333 (8.5%)            |         |
| Large                    | 999 (62.0%)          | 4003 (71.0%)         | 3245 (82.4%)          |         |
| Missing                  | 33 (2.0%)            | 124 (2.2%)           | 0                     |         |
| Hospital teaching status |                      |                      |                       | <0.001  |
| Rural                    | 34 (2.1%)            | 90 (1.6%)            | 0                     |         |
| Urban Non-Teaching       | 715 (44.4%)          | 1155 (20.5%)         | 347 (8.8%)            |         |
| Urban Teaching           | 829 (51.5%)          | 4267 (75.7%)         | 3592 (91.2%)          |         |
| Missing                  | 33 (2.0%)            | 124 (2.2%)           | 0                     |         |
| Hospital region          |                      |                      |                       | <0.001  |
| Northeast                | 323 (20.0%)          | 804 (14.3%)          | 496 (12.6%)           |         |
| Midwest                  | 383 (23.8%)          | 1332 (23.6%)         | 779 (19.8%)           |         |
| South                    | 438 (27.2%)          | 2175 (38.6%)         | 1721 (43.7%)          |         |
| West                     | 467 (29.0%)          | 1326 (23.5%)         | 944 (24.0%)           |         |
| Lymphadenectomy          |                      |                      |                       | 0.007   |
| No                       | 92 (5.7%)            | 234 (4.2%)           | 207 (5.3%)            |         |
| Yes                      | 1519 (94.3%)         | 5403 (95.8%)         | 3732 (94.7%)          |         |

Mean ( $\pm$ SD) or number (percentage per column) is shown. Chi-square test or one-way ANOVA test for *P*-value. Total number may not 11,187 due to weighted values.

**Supplemental Table S7. Multivariable analysis for perioperative complication (Open-RH cohort).**

| Characteristic           | OR (95%CI)       | P-value |
|--------------------------|------------------|---------|
| Age (yr)                 | 1.01 (1.01-1.02) | <0.001  |
| Year                     |                  | <0.001* |
| 2007                     | 1                |         |
| 2008                     | 1.24 (1.11-1.40) | <0.001  |
| 2009                     | 1.05 (0.93-1.18) | 0.432   |
| 2010                     | 0.94 (0.83-1.06) | 0.290   |
| 2011                     | 1.29 (1.12-1.49) | <0.001  |
| Race/ethnicity           |                  | <0.001* |
| White                    | 1                |         |
| Black                    | 1.44 (1.25-1.67) | <0.001  |
| Hispanic                 | 0.90 (0.80-1.02) | 0.092   |
| Asian                    | 1.10 (0.91-1.34) | 0.333   |
| Others                   | 1.46 (1.19-1.79) | <0.001  |
| Missing                  | 0.92 (0.82-1.04) | 0.177   |
| Obesity                  |                  | <0.001* |
| No                       | 1                |         |
| Class I-II               | 0.97 (0.82-1.16) | 0.758   |
| Class III                | 1.77 (1.39-2.25) | <0.001  |
| Charlson Index           |                  | <0.001* |
| 0                        | 1                |         |
| 1                        | 2.02 (1.82-2.23) | <0.001  |
| 2                        | 2.45 (1.99-3.02) | <0.001  |
| ≥3                       | 8.60 (5.58-13.3) | <0.001  |
| Median household income  |                  | <0.001* |
| <\$39,000                | 1                |         |
| \$39,000-\$47,999        | 1.02 (0.91-1.15) | 0.694   |
| \$48,000-\$62,999        | 1.24 (1.10-1.38) | <0.001  |
| ≥\$63,000                | 1.10 (0.98-1.24) | 0.120   |
| Missing                  | 0.64 (0.50-0.82) | <0.001  |
| Primary expected payer   |                  | <0.001* |
| Medicare                 | 1                |         |
| Medicaid                 | 1.00 (0.84-1.20) | 0.985   |
| Private including HMO    | 0.76 (0.65-0.89) | 0.001   |
| Others/missing           | 0.94 (0.78-1.14) | 0.532   |
| Hospital teaching status |                  | <0.001* |
| Rural                    | 1                |         |
| Urban Non-Teaching       | 0.35 (0.21-0.58) | <0.001  |
| Urban Teaching           | 0.29 (0.20-0.42) | <0.001  |
| Missing                  | 0.36 (0.26-0.52) | <0.001  |
| Hospital region          |                  | <0.001* |
| Northeast                | 1                |         |
| Midwest                  | 1.29 (1.12-1.49) | <0.001  |
| South                    | 1.44 (1.26-1.64) | <0.001  |
| West                     | 1.17 (1.02-1.34) | 0.023   |
| Lymphadenectomy          |                  |         |
| No                       | 1                |         |
| Yes                      | 1.84 (1.52-2.24) | <0.001  |
| Hospital surgical volume |                  | 0.007*  |
| Low                      | 1.19 (1.04-1.35) | 0.011   |
| Mid                      | 0.98 (0.89-1.07) | 0.595   |
| High                     | 1                |         |

A binary logistic regression model with conditional backward method. All the covariates with  $P < 0.05$  in univariable analysis were entered in the initial model, and the least significant covariate was removed

until the final model retained only the covariates with  $P < 0.05$ . \* $P$ -value for interaction. Abbreviations: OR, odds ratio; and CI, confidence interval.

**Supplemental Table S8. Multivariable analysis for perioperative mortality (Open-RH cohort,  $n=11,187$ ).**

| Characteristic           | OR (95%CI)       | <i>P</i> -value |
|--------------------------|------------------|-----------------|
| Age (yr)                 | 1.07 (1.04-1.11) | <0.001          |
| Charlson Index           |                  | <0.001*         |
| 0                        | 1                |                 |
| 1                        | na               | 0.986           |
| 2                        | 11.7 (3.67-37.2) | <0.001          |
| ≥3                       | 41.6 (14.0-124)  | <0.001          |
| Hospital surgical volume | 0.80 (0.68-0.94) | 0.006           |

A binary logistic regression model with conditional backward method. All the covariates with  $P<0.05$  in univariable analysis were entered in the initial model, and the least significant covariate was removed until the final model retained only the covariates with  $P<0.05$ . Hospital surgical volume was analyzed as a continuous variable due to no death in the large-volume group. \* $P$ -value for interaction. Abbreviations: OR, odds ratio; and CI, confidence interval.
